# Supplementary material for: Intrinsic spin Hall torque in a moiré Chern magnet
Source: Springer Nature journal article supplement (doi:10.1038/s41567-023-01979-8), 2023-03-09
Supplement: 41567_2023_1979_MOESM1_ESM.pdf [file 41567_2023_1979_MOESM1_ESM.pdf]

# Intrinsic spin Hall torque in a moiré Chern magnet

---

In the format provided by the authors and unedited

---

## SUPPLEMENTARY MATERIALS

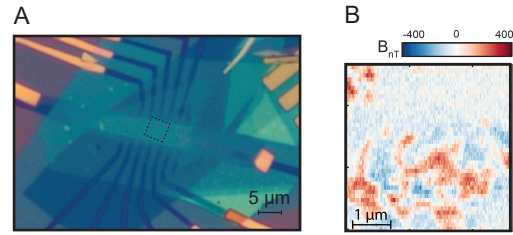

Fig. S1. **NanoSQUID imaging at  $\nu = -1$  on monolayer MoTe<sub>2</sub>/monolayer WSe<sub>2</sub> device.** (A) Optical image of a monolayer MoTe<sub>2</sub>/monolayer WSe<sub>2</sub> device. (B) NanoSQUID imaging revealed qualitatively similar magnetism and anomalous Hall resistances in this device. This device was rather disordered and did not show quantization of anomalous Hall resistance.

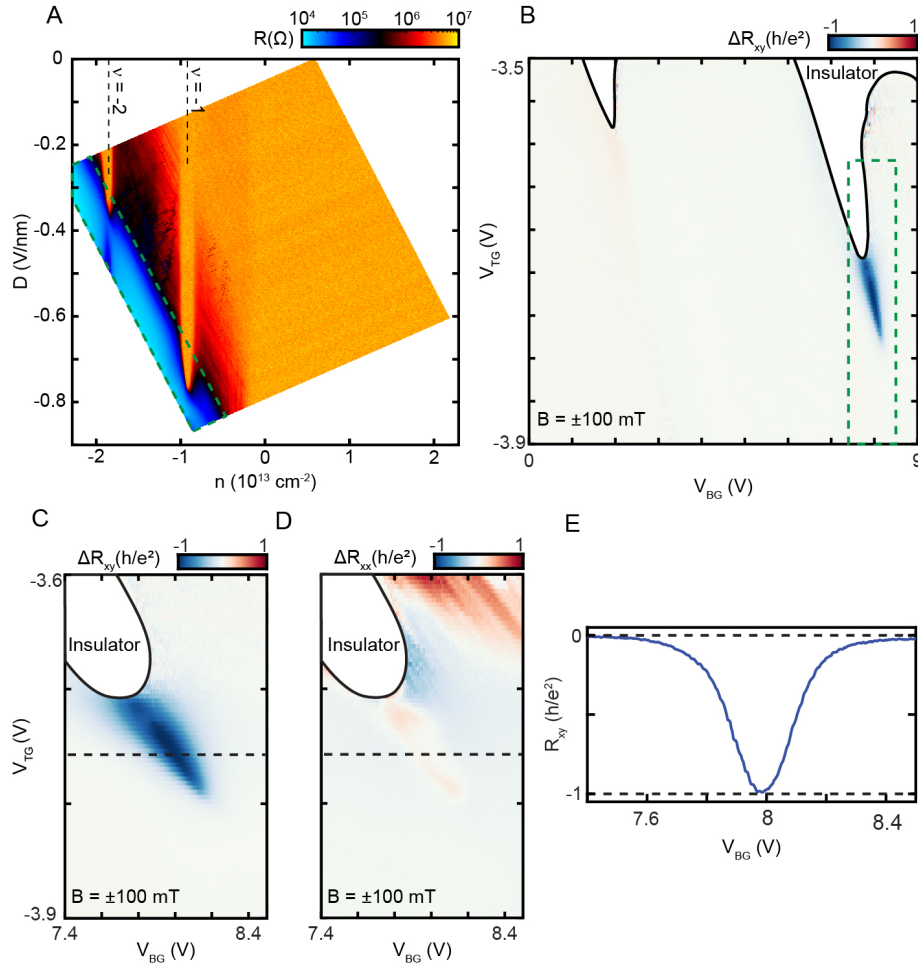

Fig. S2. **Phase diagram from transport data** (a) Two terminal resistance of device (measured between contacts  $abcd$  and  $j$ ) plotted as a function of electron density  $n$  and displacement field  $D$ , where  $D = \frac{V_{TG} - V_{BG}}{d_t + d_b}$ ,  $n = \epsilon\epsilon_0(V_{TG}/d_t + V_{BG}/d_b) + n_0$ . Here  $d_t = 2.7$  nm is the thickness of the top hBN layer,  $d_b = 12.1$  nm is the thickness of the bottom hBN layer,  $\epsilon \approx 3$  is the relative dielectric constant of hBN, and  $n_0$  is the offset charge carrier density,  $5.9 \times 10^{12} \text{ cm}^{-2}$ . At low displacement fields  $\nu = -1$  and  $\nu = -2$  both host topologically trivial insulating states, with the  $\nu = -1$  insulator presumably interaction-driven. In the electron-doping regime large contact resistances hamper transport measurements. (b)  $\Delta R_{xy}$  measurement in the region inside the green dotted line in a. A finite  $\Delta R_{xy}$  appears near  $\nu = -1$  in a narrow range of  $D$ . (c)  $\Delta R_{xy}$  measurement in the region inside the green dotted line in b. Precise quantization of  $\Delta R_{xy}$  obtains over a range of displacement fields at  $\nu = -1$ . (d) Symmetrized  $R_{xx}$  measurement in the region inside the dotted line in b. (e) Linecut of  $\Delta R_{xy}$  along the dotted line in c illustrating the appearance of a QAH effect.

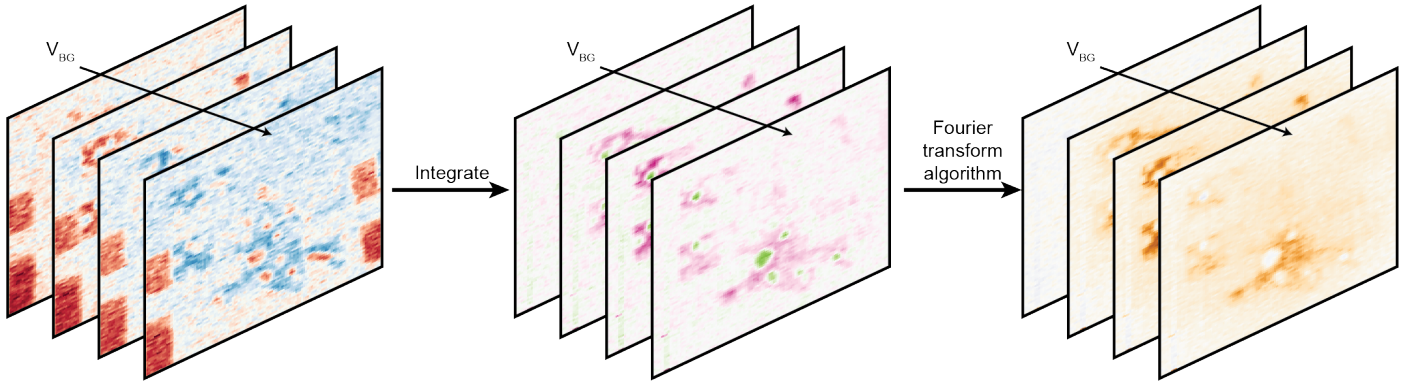

Fig. S3. **AC bottom gate conversion to magnetization.** (a) AC bottom gate magnetometry produces  $\delta B_z / \delta V_{BG}(x, y, V_{BG})$ . (b) We integrate  $\delta B_z / \delta V_{BG}(x, y, V_{BG})$  with respect to  $V_{BG}$  to obtain  $B_z(x, y, V_{BG})$  (c) For each value of  $V_{BG}$  we invert  $B(x, y)$  to produce  $m_z(x, y, V_{BG})$ , which is presented as a video of the out-of-plane magnetization as  $V_{BG}$  enters and then leaves the QAH regime in the supplementary data.

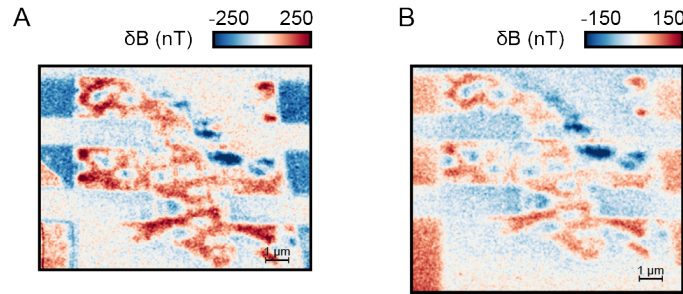

Fig. S4. **Repeated cooldowns** (a) Magnetic structure measured at 28 mT,  $V_{TG} = -3.734$  V,  $V_{BG} = 7.818$  V at a height of 125 nm with nanoSQUID diameter  $\phi = 159$  nm. (b) Magnetic structure measured at 36 mT,  $V_{TG} = -3.756$  V,  $V_{BG} = 7.943$  V during a subsequent cooldown at a height of 175 nm with nanoSQUID diameter  $\phi = 113$  nm.

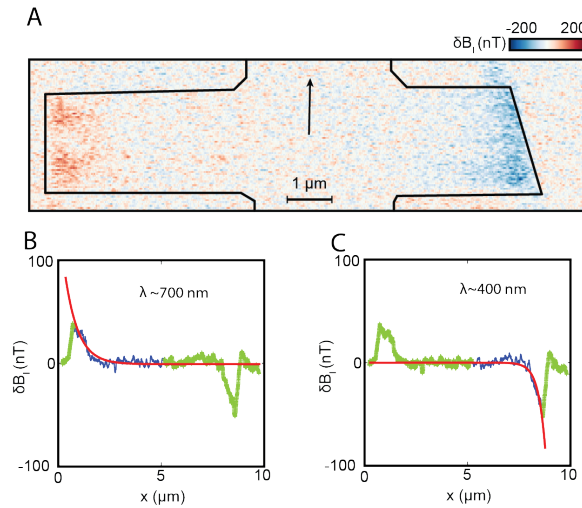

Fig. S5. **Spin diffusion length** (a) Spin Hall effect near  $\nu = -1$  (b) Fit of the left edge. Green regions are masked from the fit, blue is fit to an exponential decay function,  $B(x) = A \cdot e^{-x/\lambda} - c$ . Approximate spin diffusion length  $\lambda$  is 700 nm. (c) Fit of the right edge, approximate spin diffusion length  $\lambda$  is 400 nm.

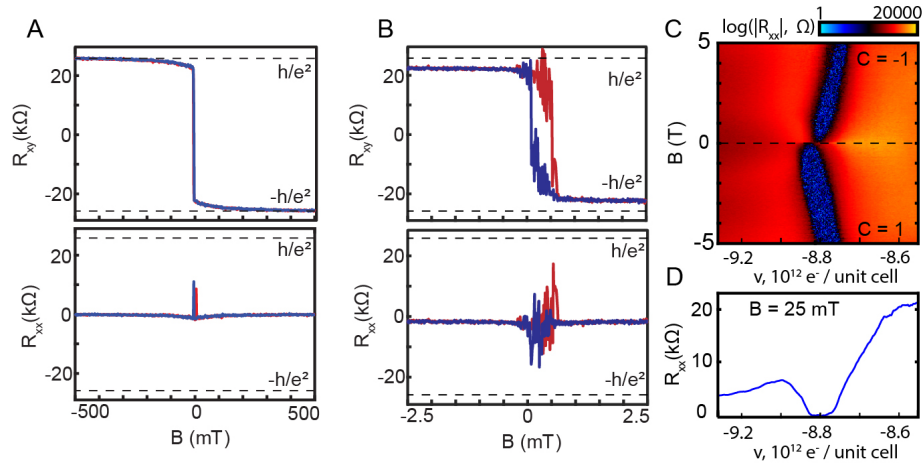

Fig. S6. **Additional transport properties of the magnetic Chern insulator** (a) Magnetic hysteresis loop in QAH regime. At  $\pm 500$  mT quantization reaches  $1.000 \pm 0.006 h/e^2$  and  $-0.996 \pm 0.005 h/e^2$ . (b) Close to  $B = 0$   $R_{xy} \approx 0.9 h/e^2$ . Coercive fields are less than 1 mT at the measurement temperature of 1.6K. (c) Dependence of the degeneracy of the Chern band on  $B$  reveals the Chern number of the ground state at finite field, which is -1 in this system. (d) Linecut shows  $R_{xx}$  reaches  $-93 \Omega \pm 115 \Omega$ .

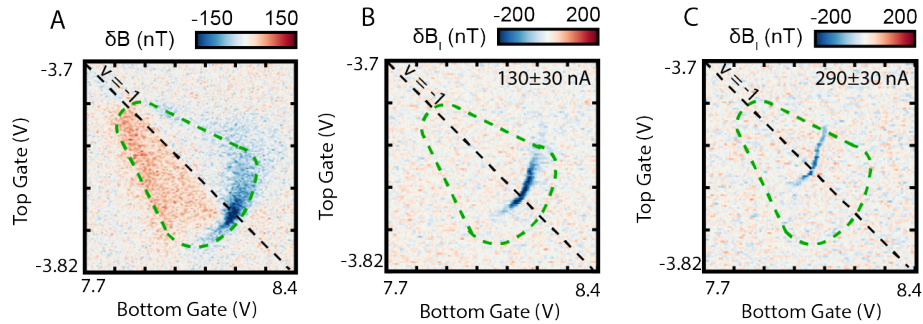

Fig. S7. **Current-switching phase diagram** (a) Bottom gate modulation magnetometry phase diagram taken at the point at which measurements for Fig. 4g were performed. The green dotted outline appears in that figure.  $\delta V_{BG} = 35$  mV was used. (b) Current-induced magnetic domain switching signal  $\delta B_I$  as a function of top and bottom gate voltages with  $I_{SD} = 130$  nA,  $\delta I_{SD} = 30$  nA. (c) The same measurement with  $I_{SD} = 290$  nA,  $\delta I_{SD} = 30$  nA. Magnetic switching appears over broad regions of the magnetic phase diagram, although currents required to effect domain switching vary with gate voltages.
